# Supplementary material for: Access to community care for people with dementia and their informal carers
Source: Springer Nature journal article supplement (doi:10.1007/s00391-017-1266-7), 2017-06-14
Supplement: MOESM2 [file 12443806]

**Supplementary Material 2**

**Introduction to a case scenario**

Mrs Smith lives alone with her cat in her own house, located in a middle-sized town (from the perspective of the respective country). Her husband passed away a couple of years ago. She has two daughters. One daughter lives with her family in the neighbourhood. The other daughter moved to the capital due to job obligations, and can only visit her mother irregularly. Every now and then, a car drive to the next bigger city is feasible for the family. Two years ago, Mrs Smith was diagnosed with dementia. During the last months, the dementia has worsened markedly. She sometimes needs supervision, and someone has to remind her to eat and drink. Some weeks ago, she also couldn't find the way back home. The daughter living in the neighbourhood is taking care for her mother, and a volunteer supports her with shopping and some leisure activities. However, the caring daughter is employed and has teenage children. Hence, she is not sure whether she can manage the increased need of care.
